RESEARCH ARTICLE

# Relational Diversity Promotes Cooperation in Prisoner's Dilemma Games

Bo Xu<sup>1\*</sup>, Jianwei Wang<sup>1</sup>, Ruipu Deng<sup>2</sup>, Miao Li<sup>3</sup>

1. School of Business Administration, Northeastern University, Shenyang, China, 2. Three Gorges Finance Company Limited, Beijing, China, 3. Department of Engineering Physics, Tsinghua University, Beijing, China

\*xubosuper@163.com

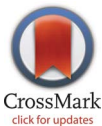

 OPEN ACCESS

**Citation:** Xu B, Wang J, Deng R, Li M (2014) Relational Diversity Promotes Cooperation in Prisoner's Dilemma Games. PLoS ONE 9(12): e114464. doi:10.1371/journal.pone.0114464

**Editor:** Zhi-Xi Wu, Lanzhou University, China

**Received:** July 24, 2014

**Accepted:** November 9, 2014

**Published:** December 4, 2014

**Copyright:** © 2014 Xu et al. This is an open-access article distributed under the terms of the [Creative Commons Attribution License](http://creativecommons.org/licenses/by/4.0/), which permits unrestricted use, distribution, and reproduction in any medium, provided the original author and source are credited.

**Data Availability:** The authors confirm that all data underlying the findings are fully available without restriction. All dataset files are available from <http://dx.doi.org/10.6084/m9.figshare.1234089>.

**Funding:** The research is supported by the National Natural Science Foundation of China under Grant No. 71102120, Startup Research Funds for Ph.D. of Liaoning Province under Grant No. 76114008, and Fundamental Research Funds of Northeastern University under grant No. 22114001. The funders had no role in study design, data collection and analysis, decision to publish, or preparation of the manuscript.

**Competing Interests:** Deng Ruipu is employed by Three Gorges Finance Company Limited and the research achievement (patents, publications, or products) is also shared by the company and has no competing interests. This does not alter the authors' adherence to PLOS ONE policies on sharing data and materials.

## Abstract

Relational diversity can be characterized by heterogeneous distributions of tie strengths in social networks and this diversity is present not only among humans, but throughout the animal world. We account for this observation by analyzing two network datasets from Facebook. We measure the strength of a tie by calculating the extent of overlap of friends between the two individuals. Based on the previous findings in human experiments, we argue that it is very unlikely that players will allocate their investments equally to their neighbors. There is a tendency that players prefer to donate more to their intimate friends. We find that if players preferentially allocate their investments to their good friends, cooperation will be promoted in PDG. We proved that the facilitation of the cooperative strategy relies mostly on the cooperative allies between best friends, resulting in the formation of cooperative clusters which are able to prevail against the defectors even when there is a large cost to cooperate. Moreover, we discover that the effect of relational diversity cannot be analyzed by adopting classical complex networks models, because neither of the artificial networks is able to produce networks with diverse distributions of tie strengths. It is of vital importance to introduce real social networks to study the influence of diverse relations especially when it comes to humans. This research proposes a brand new perspective to understand the influence of social relations on the emergence of cooperation in evolutionary prisoner's dilemma games.

## Introduction

Social relations or social ties are defined as information-carrying connections between people in social networks [1]. Social ties may simply reflect binary relations (the presence or absence of a relation) or they may reflect the strength of

a relation between two individuals (e.g. the emotional intensity, the intimacy etc.). Most previous investigations on evolutionary games in social networks adopt the binary definition of the social relation [2–4], i.e. A and B are either friends or strangers. Under such definitions, the relationships between friends are universally identical and players will treat all their friends equally. However, social relations or social ties exhibit the feature of diversity in reality. As Granovetter argued, social ties come in three varieties according to tie strengths: strong, weak, or absent [5]. Strong ties exist between close friends or family members, while absent ties denote those relationships without substantial significance, such as “nodding” relationships between people living on the same street. Since most human individuals in social networks socialize with their friends through their social ties, the diverse nature of such social relations will inevitably influence the behavioral traits of interactions between players. Therefore, the strength of social ties should have a significant impact on the evolution of cooperation especially in human social networks. This research tries to unveil the important role of tie strengths in evolutionary prisoner's dilemma games.

In the classical evolutionary prisoner's dilemma game (PDG) model [6], each player has two feasible actions: cooperation (C) or defection (D). Both players get R (reward) for mutual cooperation and P (punishment) for mutual defection. A defector exploiting a cooperator gets T (the temptation to defect) and the exploited cooperator gets S (the sucker's payoff). R, P, T, S satisfies following conditions:  $T > R > P > S$  and  $2R > T + S$ . To better illustrate the roles of diverse relations in PDG, we consider an important special case called the “donation game” (DG) [7–10] in this paper. In a DG, each player can cooperate by providing a benefit  $b$  to the other player at his or her cost  $c$ , with  $0 < c < b$ . Then,  $T = b$ ,  $R = b - c$ ,  $P = 0$ , and  $S = -c$ . The payoff matrix is (see [table 1](#)).

In the network context, a cooperator's ability to invest in others is proportional to his or her connectivity  $k$ . A player is able to donate as much as  $kc$  to his or her counterparts in each round. Previous studies assumed that the cooperator will allocate his  $kc$  investment equally to his  $k$  friends without any preferences and each friend will get a benefit  $b$  from the investment  $c$ . Under such settings, it is suggested that both lattice network and scale free network contribute to the preservation of cooperation in PDG [11–14]. Moreover, Santos et. al. found that degree diversity promotes the emergence of cooperation in public good games (PGG) [15]. Since the degree of a node usually represents its relative importance and influence in the social network, several studies also explored the heterogeneous influence of the nodes' degree on the evolution of cooperation in PDG and PGG [16–18]. However, as far as we know, the degree-related influence is not observed in reality. No empirical evidence can support the above degree-related arguments. Instead, researchers have discovered the influence of social relations from empirical experiments, which can be regarded as a solid evidence of the existence of heterogeneous relational influence. The empirical test conducted by Harrison et. al. suggested that the strength of a social tie can predict the cooperative investment in a human social network [19]. The cost endured was positively correlated with the strength of the social tie between donor and

Table 1.

|   | C        | D     |
|---|----------|-------|
| C | b-c, b-c | -c, b |
| D | b, -c    | 0,0   |

doi:10.1371/journal.pone.0114464.t001

recipient. In other words, a cooperator is more willing to invest in his or her close friends rather than those with only nodding relations [20]. For example, parents would sacrifice everything to their children but little to their ordinary neighbors. Investments from cooperators are distributed heterogeneously among their friends and this heterogeneity is related to their diverse relationships, i.e. tie strengths. Inspired by the above empirical observations, we introduce a relation-based investment strategy into the evolutionary PDG model to investigate how such heterogeneous allocation mechanism affects the final outcome of the game.

It is worth noting here that we cannot just randomly assign a strength value to a tie in the social network, because numerous previous studies demonstrated that the strength of a tie is associated with its structural position in the social network. Scott et.al. suggested that social embeddedness is a stable structural measure of the strength of a tie in social networks, which is defined as the extent of overlap of social relations between the two individuals [21]. Onnela et. al. [22] studied a mobile phone dataset and defined the aggregated duration of call time between user A and B as the real tie strength between them. Their research also suggested that the stronger the tie between the two users, the more their friends overlap. In other words, the extent of overlapping friends can be a reasonable approximation of the tie strength between two individuals in social networks [23]. The tie strength  $ts_{ij}$  between  $i$  and  $j$  can be calculated as follows:

$$ts_{ij} = \frac{n_{ij}}{(k_i - 1) + (k_j - 1) - n_{ij}} \tag{1}$$

where  $n_{ij}$  is the number of common neighbors of  $i$  and  $j$ ,  $k_i$  and  $k_j$  represent the degree of  $i$  and  $j$  respectively. It is worth mentioning that we will give a minimum tie strength value to a pair of friends if they have no common neighbors (not zero, because they do have a friendship). Another important problem of analyzing the effect of diverse relations is that we cannot adopt classical complex network models (e.g. ER, BA, etc.) [24–28] as the structure of the population, because none of these models produces diverse tie strength distributions as we expected in real social networks. To tackle this problem, we use two online social network datasets collected from Facebook.com to perform the analysis. It is illustrated in figure 1 that the real social network we adopted exhibits a more heterogeneous tie strength distribution comparing to other artificial networks such as the BA network.

This paper is organized as follows: In section 2, we give a comprehensive description of the datasets. In section 3, we introduce the model of PDG with a

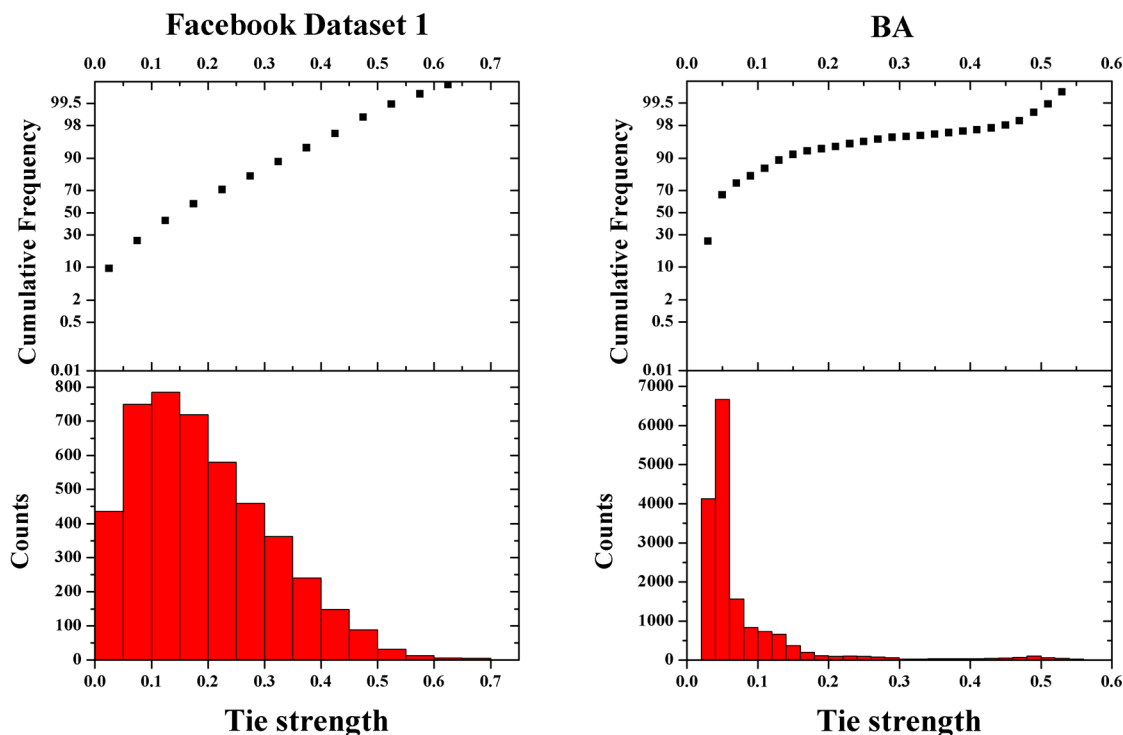

**Figure 1. A comparison of the tie strength distributions between a BA network and the network we collected from Facebook.com.** The two networks have exactly the same number of nodes and edges. The strength of each tie is calculated by using equation 1. It is obvious that most of the ties in the BA network have approximately zero tie strength, while the Facebook network exhibits a diverse tie strength distribution.

doi:10.1371/journal.pone.0114464.g001

heterogeneous investment strategy depending on tie strengths. Simulation results and discussions are given in section 4.

### Dataset Description

Facebook.com is currently the most popular SNS platform. Users interact by updating personal status, sending private messages, playing desktop games, sharing photos and videos etc. It was initially designed to facilitate communications of college students, and soon became prevalent all over the world. Therefore, the Facebook network can well represent the structure of population in reality.

We plan to perform the analyses on two Facebook datasets with different scales to show that the size of the network has no influence on the conclusion. All datasets are available at <http://people.maths.ox.ac.uk/porterm/data/facebook5.zip>. A comparison of primary parameters of the two networks is made in table 2. The establishment of friendship in Facebook requires mutual authentication, thus we can infer an undirected graph of its network structure.

Complex network theory [29–31] claimed that most networks in reality (WWW, Internet, DNA, etc.) follow the power law degree distribution, where the probability  $p(k)$  that a randomly selected node having  $k$  edges obeys the form

Table 2.

|                        | Dataset 1 | Dataset 2 |
|------------------------|-----------|-----------|
| Connected vertices     | 769       | 6596      |
| Connected edges        | 11656     | 293320    |
| Average Connectivity   | 16.15     | 44.469    |
| Diameter               | 6         | 9         |
| Density                | 0.0564    | 0.0135    |
| Average path length    | 2.3378    | 2.6761    |
| Clustering coefficient | 0.2912    | 0.1639    |

doi:10.1371/journal.pone.0114464.t002

$p(k) \sim k^{-\gamma}$ . However, [figure 2](#) shows that the degree distributions of the two network datasets do not follow such degree distribution, although they are heterogeneous networks.

### The Model

We assume that the ability of a player in the network is proportional to his or her degree. A cooperator  $i$  having  $k$  friends has a total amount of  $kc$  investments in each round and will invest  $kc \frac{ts_{ij}^\alpha}{\sum_m ts_{im}^\alpha}$  to his friend  $j$ . Therefore, the recipient  $j$  will

get  $kb \frac{ts_{ij}^\alpha}{\sum_m ts_{im}^\alpha}$  from  $i$ 's investment. Here,  $ts_{ij}$  denotes the strength of the tie between

the player  $i$  and  $j$ , and  $m$  runs over all  $i$ 's friends.  $\alpha$  is a tunable parameter controlling the preference of the cooperator. If  $\alpha=0$ , the model becomes a classical PDG. The cooperator will equally distribute his investments and each of his friends gets a benefit  $b$ . If  $\alpha>0$ , the cooperator will preferentially invest in his good friends. When  $\alpha \rightarrow +\infty$ , the cooperator will give all his investments to his best friend. The payoff of player  $x$  can be expressed as:

$$P_{xC} = b \sum_{i \in \Gamma_{xC}} k_j \frac{ts_{ix}^\alpha}{\sum_{j \in \Omega_i} ts_{ij}^\alpha} - k_x c \tag{2}$$

$$P_{xD} = b \sum_{i \in \Gamma_{xC}} \frac{ts_{ix}^\alpha}{\sum_{j \in \Omega_i} ts_{ij}^\alpha} \tag{3}$$

where  $\Gamma_{xC}$  denotes the set of  $x$ 's friends adopting  $C$  and  $\Omega_i$  represents the set of  $i$ 's friends.

In each round, player  $x$  is allowed to adopt the strategy of a randomly selected friend  $y$  with a probability  $pr_{x \rightarrow y}$  proportional to their payoff difference.

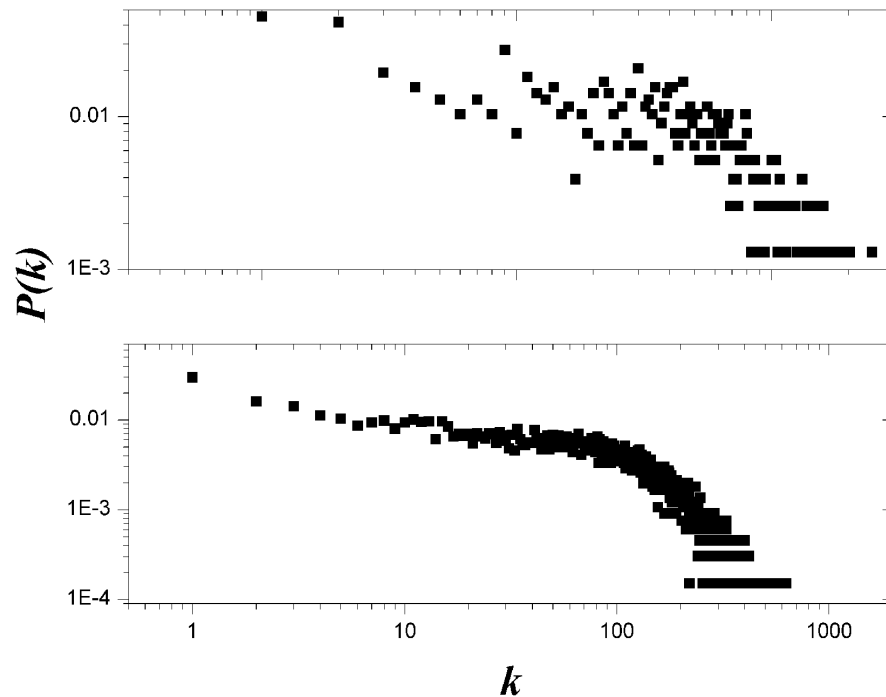

**Figure 2. An illustration of degree distributions of the two social networks.**

doi:10.1371/journal.pone.0114464.g002

$$pr_{x \rightarrow y} = \frac{1}{1 + \exp[(P_x - P_y)/\kappa]} \tag{4}$$

Where  $p_x$  and  $p_y$  stand for the payoff of player  $x$  and  $y$  in each round;  $\kappa$  is a parameter characterizing bounded rationality during evolution,  $\kappa=0$  represents complete rationality,  $\kappa = +\infty$  represents complete randomness. We set  $\kappa=0.02$  in this study.

### Simulation Results and Discussions

Initially, equal percentage of cooperators and defectors is randomly distributed among the whole population. Strategies of all players are updated simultaneously after each round. The equilibrium fraction of cooperators is obtained by averaging over 1000 generations after a transient time of 10000 generations.

The simulation results (see [figure 3](#)) show that there is a positive relationship between  $\alpha$  and  $f_C$ , indicating that if cooperators preferentially allocate investments to their good friends, cooperation will be promoted. It is worth noting here that cooperation is prohibited if we adopt traditional PDG models ( $\alpha=0$ ) in the above social networks. This result is in agreement with Ohtsuki's fixation probability theory arguing that high connectivity will suppress cooperation in social networks [7, 32]. Unlike scale free networks, most real social networks are highly dense and

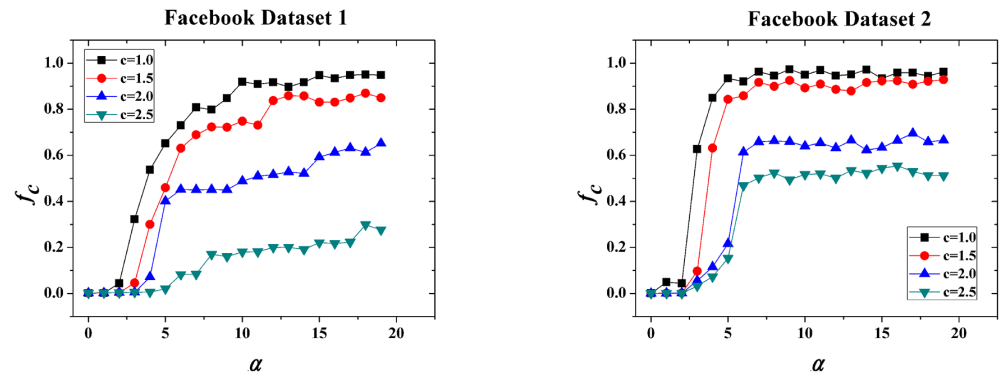

**Figure 3. The fraction of cooperators in equilibrium ( $f_c$ ) vs  $\alpha$  for different values of  $c$ .** We set  $b=20$  as a constant in all simulations. The two figures show that the increase of  $c$  prohibits cooperation since greater  $c$  decreases the cooperators' payoff. Moreover, there is a positive relationship between the preference  $\alpha$  and  $f_c$  indicating that preferentially allocating investments to good friends promotes cooperation.

doi:10.1371/journal.pone.0114464.g003

clustered. Despite that their degree distributions are indeed heterogeneous, cooperation is still unlikely to emerge in real social networks under traditional settings for the reason that the increasing connectivity will increase the players' opportunities to play with defectors. Therefore, cooperators are more likely to be invaded by defectors and cooperative clusters will be destructed. Luckily, as we argued above, players are unlikely to treat all their friends equally. The strong social ties enable players to sacrifice more to their best friends, and thus lead to heterogeneous allocation of investments among the entire population.

Fig. 4. shows the different evolutionary processes of cooperation under different  $\alpha$ . It is obvious that strong preferences on best friends have dramatically promoted cooperation. Since greater  $\alpha$  strengthens the interactions between good friends, it is natural to infer that such strong relations play key roles on the maintenance of cooperation in social networks. To explain such results, we consider an extreme scenario where the preferences on strong relations are very strong ( $\alpha \rightarrow +\infty$ ). Under this setting, players will only invest in their best friend and their nodding friends get almost nothing from them, i.e. the interactions between best friends determine the processes of evolution. Moreover, it is worth noting here that most best friends are mutual in our empirical datasets. We observe 130 pairs of mutual best friends in dataset 1 and 1118 pairs in dataset 2. This is in agreement with the classical social network theory arguing that reciprocity is a key feature of social relations in real populations [33, 34]. Individuals tend to behave towards someone in the manner in which they behave toward him. If the best friend of A is B, then A is very likely to be the best friend of B. Therefore, the interactions between mutual best friends determine the direction of evolution in real social networks. Consider a pair of mutual best friends  $i$  and  $j$ , there are four possibilities for their strategic portfolios: (1)  $i$  and  $j$  are both cooperators; (2)  $i$  is a cooperator and  $j$  is a defector; (3)  $i$  is a defector and  $j$  is a cooperator; (4)  $i$  and  $j$  are both defectors. In the last three situations, it is obvious that mutual defection is the only equilibrium for  $i$  and  $j$ . Because even in (2) and (3), the defector will get much more support

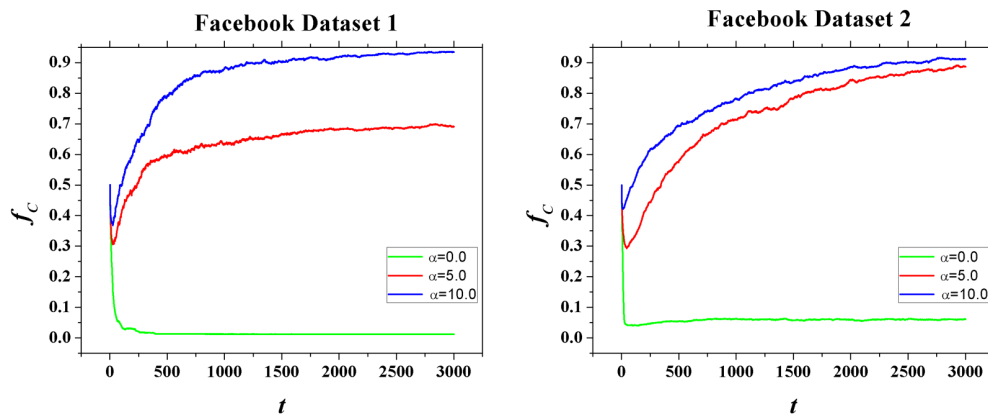

**Figure 4. The effect of investment preferences  $\alpha$  on the evolution of cooperation.**  $t$  denotes time steps. We set  $b=20$  and  $c=1$  here. The results show that cooperation is prohibited if the investment preference is weak ( $\alpha=0$ ). Extremely strong  $\alpha$  leads to global cooperation.

doi:10.1371/journal.pone.0114464.g004

from his best friend and thus his payoff will become significantly higher than that in classical models where  $\alpha=0$ . Defection is favored if at least one of the mutual best friends adopts D. However, if the two mutual best friends adopt mutual cooperation, the overall payoff of this cooperation ally will become extremely large. The two friends will support each other with all of their investments and each of the friends receives significantly greater benefits. If  $i$  and  $j$  are mutual best friends and  $\alpha \rightarrow +\infty$ , the total payoff of player  $i$  and  $j$  of the four scenarios can be calculated as follows:

### Scenario 1

$i$  and  $j$  are mutual cooperators:

$$P_i + P_j = (k_i + k_j)(b - c) \tag{5}$$

Let  $k_i \approx k_j = k$ :

$$P_i + P_j = 2k(b - c) \tag{6}$$

### Scenario 2 and 3

$i$  ( $j$ ) is a cooperator and  $j$  ( $i$ ) is a defector:

$$P_i + P_j = k_i(b - c), \text{ if } i \text{ is a cooperator} \tag{7}$$

$$P_i + P_j = k_j(b - c), \text{ if } j \text{ is a cooperator} \tag{8}$$



Since  $i$  and  $j$  are mutual best friends, we can infer that most of the friends of player  $i$  and  $j$  overlap (see equation 1). Therefore,  $k_i$  and  $k_j$  are highly correlated with each other. Let  $k_i \approx k_j = k$ , we have:

$$P_i + P_j = k(b - c) \tag{9}$$

#### Scenario 4

$i$  and  $j$  are mutual defectors:

$$P_i + P_j = 0 \tag{10}$$

In scenario 1, mutual defection produces zero benefit since neither of the friends is willing to invest in their counterparts.

The above equations show that if a cooperator has a relatively large degree and his best friend is also a cooperator (scenario 4), they will produce the greatest payoff and form an extremely strong cooperation ally. This ally is hard to be invaded by other defectors. Instead, it tends to transform its neighboring defectors into cooperators. [Figure 5](#) illustrates a simplified situation where two best friends are mutual cooperators. The figure shows when  $\alpha$  is large, the two best friends support each other with all their investments. Their payoff becomes so large that they will turn all their neighbors into cooperators. To validate this analysis, we randomly select two pairs of mutual best friends from dataset 1 as cooperators and leave all other players as defectors initially before the game starts. The simulation result (see [Fig. 6.](#)) shows that only two pairs of mutual cooperators can lead to global cooperation in a real social network.

As suggested by the experiment conducted by Harrison et. al., mutual good friends are more willingly to cooperate with each other and invest more to each other [19]. This finding indicates that instead of randomly distributing equal percentage of cooperators and defectors before the game starts, it is human nature that players will preferentially cooperate with their good friends. Such born preference facilitates the formation of cooperative clusters from the very beginning, and thus promotes cooperation. Moreover, the existence of such preferences implies that a player can play different roles in the same round. In our proposed model, the parameter  $\alpha$  is a tunable parameter controlling this preference. When  $\alpha$  is extremely large, a player will be a cooperator to his best friend (invest all) and a defector to all other friends (investment nothing) in the same round. When  $\alpha$  is zero, a player can only choose to be either a cooperator or a defector in a given round and this identity is the same to all his friends. The presence of diverse social relations endows players with different roles when playing against friends of different tie strengths and this diversity promotes cooperation in PDG.

Further, we argue that the introduction of real social network datasets has very important implications on the understanding of cooperative behaviors in reality.

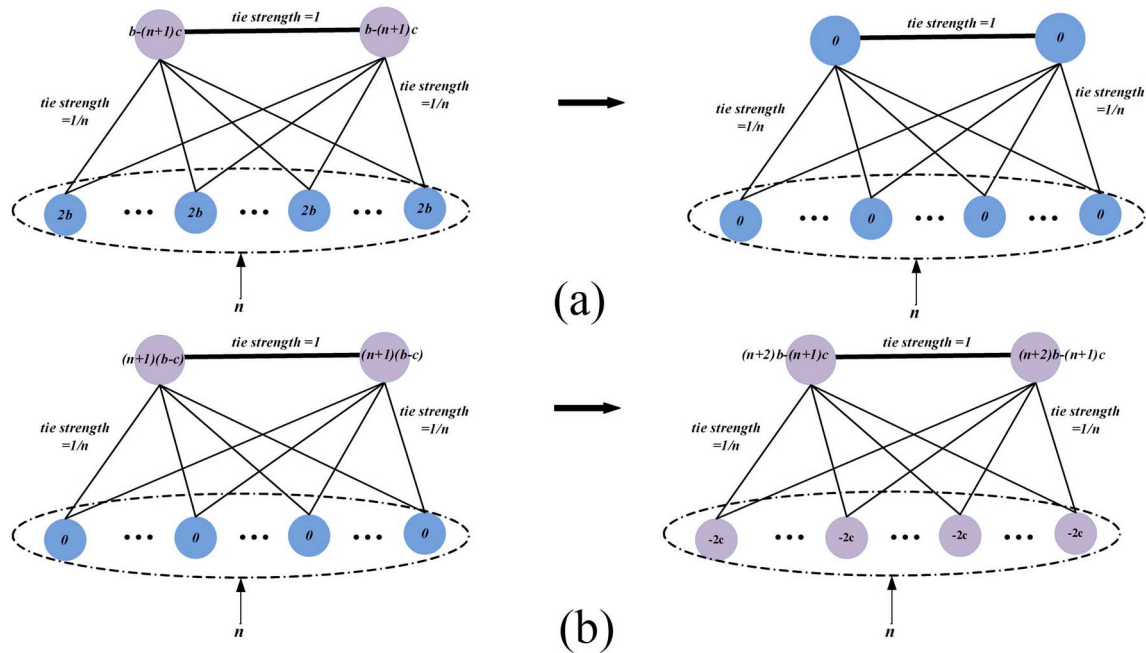

**Figure 5. A simple illustration of the influence of  $\alpha$  on the evolution of cooperation in PDG.** Here, pink nodes denote cooperators and blue nodes denote defectors. All the two top nodes' friends overlap, therefore the tie strength between them equals one. All other relations have a tie strength equals  $1/n$ . We set the two mutual best friends as cooperators initially. (a) When  $\alpha=0$ , the game is a classical PDG. The two cooperators get a payoff of  $b-(n+1)c$  and all the defectors get  $2b$ . Therefore, cooperators will imitate the strategy of defectors and defection becomes prevalent; (b) When  $\alpha=+\infty$ , the two cooperators will invest all their investments to each other. Both cooperators get  $(n+1)(b-c)$  and all defectors get 0. Therefore, in the next round, all defectors will adopt C and cooperation becomes prevalent.

doi:10.1371/journal.pone.0114464.g005

Our study shows the limitations of traditional complex network models in analyzing the effect of diverse social relations in PDG. Despite that artificial network models indeed capture some important features of networks in reality, such as heterogeneous degree distribution, small world property, etc., they are incapable of reflecting some crucial features of social relations. To sum up, the

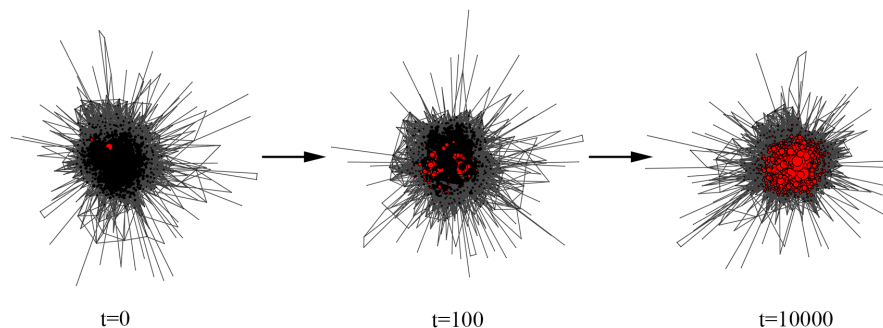

**Figure 6. The evolution of cooperation in Facebook dataset 1 with denoting only two pairs of best friends (four cooperators) as cooperators initially.** The size of each node is related to its degree. Red nodes represent cooperators and black nodes represent defectors. We set  $b=20$ ,  $c=1$  and  $\alpha=20$ . The game is repeated for 10000 times. The fraction of cooperators becomes 1 after 2000 time steps.

doi:10.1371/journal.pone.0114464.g006

deficiencies of complex network models in depicting social relations lie in following aspects: First, complex network models fail to represent the diversity of social relations. As we illustrated in [figure 1](#), the distribution of tie strengths in real networks should be heterogeneous if we use equation 1 to calculate tie strengths. However, none of the current network generating models is able to produce such networks; Second, most social relations are reciprocal in reality. If A's best friend is B, then B's best friend is also very likely to be A. We didn't find this feature in artificial networks. Third, we cannot generate an artificial network and randomly assign tie strengths to its ties. Numerous previous studies have already confirmed the positive relationship between the strength of the tie and the extent of overlap of social relations between the two individuals. Randomly assigning tie strength values cannot reflect this structural feature. The above three problems make artificial network models incapable of presenting the features of social ties in reality. Since player interactions are carried out through social ties, the diverse nature of social relations will inevitably pose significant influence on players' behavioral patterns in games. Neglecting such important features will hinder our perception of the evolutionary games. The simulation results on BA networks also confirm our argument (see [figure 7](#)).

## Conclusion

The existence of social relations is the fundamental premise of the interactions between individuals in social networks. It is suggested that the intrinsic nature of the social relationships has a significant impact on the behavioral patterns of the player level interactions [[35–38](#)]. Although the classical hypothesis of homo economicus argues that the only pursuit of a selfish player is to maximize his own benefits [[39, 40](#)], empirical experiments show that players do exhibit some degree of altruism in reality and the extent of this altruism is positively related to the tie strength between the two players [[19](#)]. A player is more cooperative when playing with a good friend and more selfish when playing with a nodding friend. In other words, the diverse distribution of tie strengths endows players with different roles when facing different opponents and such relational diversity will inevitably influence the evolution of cooperation in PDG. Previous studies discovered that social diversity promotes cooperation in evolutionary games [[41](#)]. The effects of the diversity of degree [[13, 14](#)], wealth [[17](#)], multiplication factors [[42, 43](#)] etc. are proven to be facilitative to the emergence of cooperation in PDG. However, no investigation on the effect of diverse social relations has been conducted so far. Our research tries to fill this gap by proposing a relation based investment mechanism in PDG. Based on the empirical findings in human experiments, we propose a model arguing that a player is not likely to distribute his investments equally to his friends in reality. His good friends tend to get more from his investments and those nodding friends usually get little. We prove that this relation based preference promotes cooperation since cooperation allies between good friends produce large payoffs to resist the invasion of defectors; In fact, this

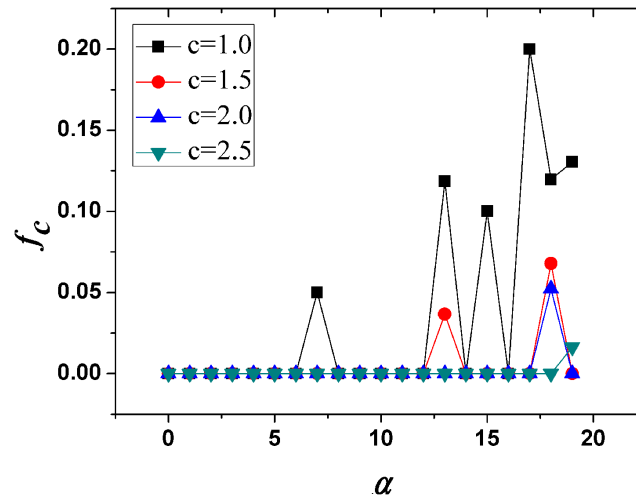

**Figure 7. An identical simulation test is performed on a scale free BA network.** The network has exactly the same number of nodes and edges as that in Facebook dataset 1. We observe no significant influence of  $\alpha$  on the evolution of cooperation.

doi:10.1371/journal.pone.0114464.g007

investment strategy infers the fact that players can play different roles while facing friends with different tie strengths. They are more likely to cooperate (defect) with their good (ordinary) friends; Moreover, this research also highlights the importance of introducing real social network data into the analysis of the networked PDG. We show that neither of the classical complex network models is suitable to explain the effect of tie strength on the evolution of cooperation in real social networks, because real social networks exhibit diverse tie strength distributions and reciprocal social relations which cannot be produced by artificial network models. The conclusions of this research have very important theoretical and practical implications and we believe that the introduction of diverse social relationships will significantly improve our understandings on the evolution of cooperation in PDG.

### Author Contributions

Conceived and designed the experiments: BX JWW. Performed the experiments: BX RPD ML. Analyzed the data: BX JWW RPD. Contributed reagents/materials/analysis tools: BX RPD. Contributed to the writing of the manuscript: BX JWW.

### References

1. Wasserman S (1994) Social network analysis: Methods and applications: Cambridge university press.
2. Perc M (2009) Evolution of cooperation on scale-free networks subject to error and attack. New Journal of Physics 11: 033027.
3. Ren J, Wang W-X, Qi F (2007) Randomness enhances cooperation: a resonance-type phenomenon in evolutionary games. Physical Review E 75: 045101.

4. Szabó G, Fath G (2007) Evolutionary games on graphs. *Physics Reports* 446: 97–216.
5. Granovetter MS (1973) The strength of weak ties. *American journal of sociology*: 1360–1380.
6. Axelrod R, Hamilton WD (1981) The evolution of cooperation. *Science* 211: 1390–1396.
7. Ohtsuki H, Hauert C, Lieberman E, Nowak MA (2006) A simple rule for the evolution of cooperation on graphs and social networks. *Nature* 441: 502–505.
8. Hilbe C, Nowak MA, Sigmund K (2013) Evolution of extortion in Iterated Prisoner's Dilemma games. *Proceedings of the National Academy of Sciences* 110: 6913–6918.
9. Szolnoki A, Perc M (2014) Evolution of extortion in structured populations. *Physical Review E* 89: 022804.
10. Szolnoki A, Perc M (2014) Defection and extortion as unexpected catalysts of unconditional cooperation in structured populations. *Sci Rep* 4.
11. Nowak MA, Bonhoeffer S, May RM (1994) Spatial games and the maintenance of cooperation. *Proceedings of the National Academy of Sciences* 91: 4877–4881.
12. Nowak MA, May RM (1992) Evolutionary games and spatial chaos. *Nature* 359: 826–829.
13. Santos FC, Pacheco JM (2005) Scale-free networks provide a unifying framework for the emergence of cooperation. *Physical Review Letters* 95: 098104.
14. Santos FC, Pacheco JM, Lenaerts T (2006) Evolutionary dynamics of social dilemmas in structured heterogeneous populations. *Proceedings of the National Academy of Sciences of the United States of America* 103: 3490–3494.
15. Santos FC, Santos MD, Pacheco JM (2008) Social diversity promotes the emergence of cooperation in public goods games. *Nature* 454: 213–216.
16. Cao X-B, Du W-B, Rong Z-H (2010) The evolutionary public goods game on scale-free networks with heterogeneous investment. *Physica A: Statistical Mechanics and its Applications* 389: 1273–1280.
17. Du WB, Cao XB, Hu MB, Wang WX (2009) Asymmetric cost in snowdrift game on scale-free networks. *Epl* 87.
18. Du WB, Cao XB, Zhao L, Hu MB (2009) Evolutionary games on scale-free networks with a preferential selection mechanism. *Physica a-Statistical Mechanics and Its Applications* 388: 4509–4514.
19. Harrison F, Sciberras J, James R (2011) Strength of Social Tie Predicts Cooperative Investment in a Human Social Network. *PLoS ONE* 6: e18338.
20. Xu B, Liu L, You WJ (2011) Importance of tie strengths in the prisoner's dilemma game on social networks. *Physics Letters A* 375: 2269–2273.
21. Feld SL (1997) Structural embeddedness and stability of interpersonal relations. *Social networks* 19: 91–95.
22. Onnela J-P, Saramäki J, Hyvönen J, Szabó G, Lazer D, et al. (2007) Structure and tie strengths in mobile communication networks. *Proceedings of the National Academy of Sciences* 104: 7332–7336.
23. Zhao J, Wu J, Xu K (2010) Weak ties: Subtle role of information diffusion in online social networks. *Physical Review E* 82: 016105.
24. Barabási A-L, Albert R (1999) Emergence of scaling in random networks. *science* 286: 509–512.
25. Erdős P, Renyi A (1961) On the strength of connectedness of a random graph. *Acta Mathematica Hungarica* 12: 261–267.
26. Lei CA, Wu T, Jia JY, Cong R, Wang L (2010) Heterogeneity of allocation promotes cooperation in public goods games. *Physica a-Statistical Mechanics and Its Applications* 389: 4708–4714.
27. Chen XJ, Perc M (2014) Optimal distribution of incentives for public cooperation in heterogeneous interaction environments. *Frontiers in Behavioral Neuroscience* 8.
28. Wang X, Chen X, Wang L (2014) Random allocation of pies promotes the evolution of fairness in the Ultimatum Game. *Sci Rep* 4.
29. Cao XB, Hong C, Du WB, Zhang J (2013) Improving the network robustness against cascading failures by adding links. *Chaos Solitons & Fractals* 57: 35–40.

30. **Du WB, Wu ZX, Cai KQ** (2013) Effective usage of shortest paths promotes transportation efficiency on scale-free networks. *Physica a-Statistical Mechanics and Its Applications* 392: 3505–3512.
31. **Liu C, Du WB, Wang WX** (2014) Particle Swarm Optimization with Scale-Free Interactions. *Plos One* 9.
32. **Li C, Zhang B, Cressman R, Tao Y** (2013) Evolution of Cooperation in a Heterogeneous Graph: Fixation Probabilities under Weak Selection. *PloS one* 8: e66560.
33. **Xu B, Huang Y, Kwak H, Contractor N** (2013) Structures of broken ties: exploring unfollow behavior on twitter. *Proceedings of the 2013 conference on Computer supported cooperative work*. San Antonio, Texas, USA: ACM. pp. 871–876.
34. **Golder SA, Yardi S**. Structural Predictors of Tie Formation in Twitter: Transitivity and Mutuality; 2010 20–22 Aug. 2010. pp. 88–95.
35. **Levin DZ, Cross R** (2004) The strength of weak ties you can trust: The mediating role of trust in effective knowledge transfer. *Management science* 50: 1477–1490.
36. **Marsden PV, Campbell KE** (1984) Measuring tie strength. *Social forces* 63: 482–501.
37. **White DR, Houseman M** (2002) The navigability of strong ties: Small worlds, tie strength, and network topology. *Complexity* 8: 72–81.
38. **Wirtz J, Chew P** (2002) The effects of incentives, deal proneness, satisfaction and tie strength on word-of-mouth behaviour. *International Journal of Service Industry Management* 13: 141–162.
39. **Henrich J, Boyd R, Bowles S, Camerer C, Fehr E, et al.** (2001) In search of homo economicus: behavioral experiments in 15 small-scale societies. *American Economic Review*: 73–78.
40. **Thaler RH** (2000) From homo economicus to homo sapiens. *The Journal of Economic Perspectives*: 133–141.
41. **Perc M, Szolnoki A** (2008) Social diversity and promotion of cooperation in the spatial prisoner's dilemma game. *Physical Review E* 77.
42. **Shi DM, Zhuang Y, Wang BH** (2010) Group diversity promotes cooperation in the spatial public goods game. *Epl* 90.
43. **Xia CY, Ma ZQ, Wang YL, Wang JS, Chen ZQ** (2011) Enhancement of cooperation in prisoner's dilemma game on weighted lattices. *Physica a-Statistical Mechanics and Its Applications* 390: 4602–4609.
